# Supplementary material
Source: PubMed Central journal article supplement (PMC8665227)
Supplement: NIHMS1740593-supplement-Supplemental_Digital_Content.pdf [file NIHMS1740593-supplement-Supplemental_Digital_Content.pdf]

**Supplement Figure 1.** Flowchart of the selection of study population (n=7,289) from the source population (n=38,600). The main track represents the selection of the patients in the primary analyses, and the derivative track represents the selection of the patients in the sensitivity analyses.

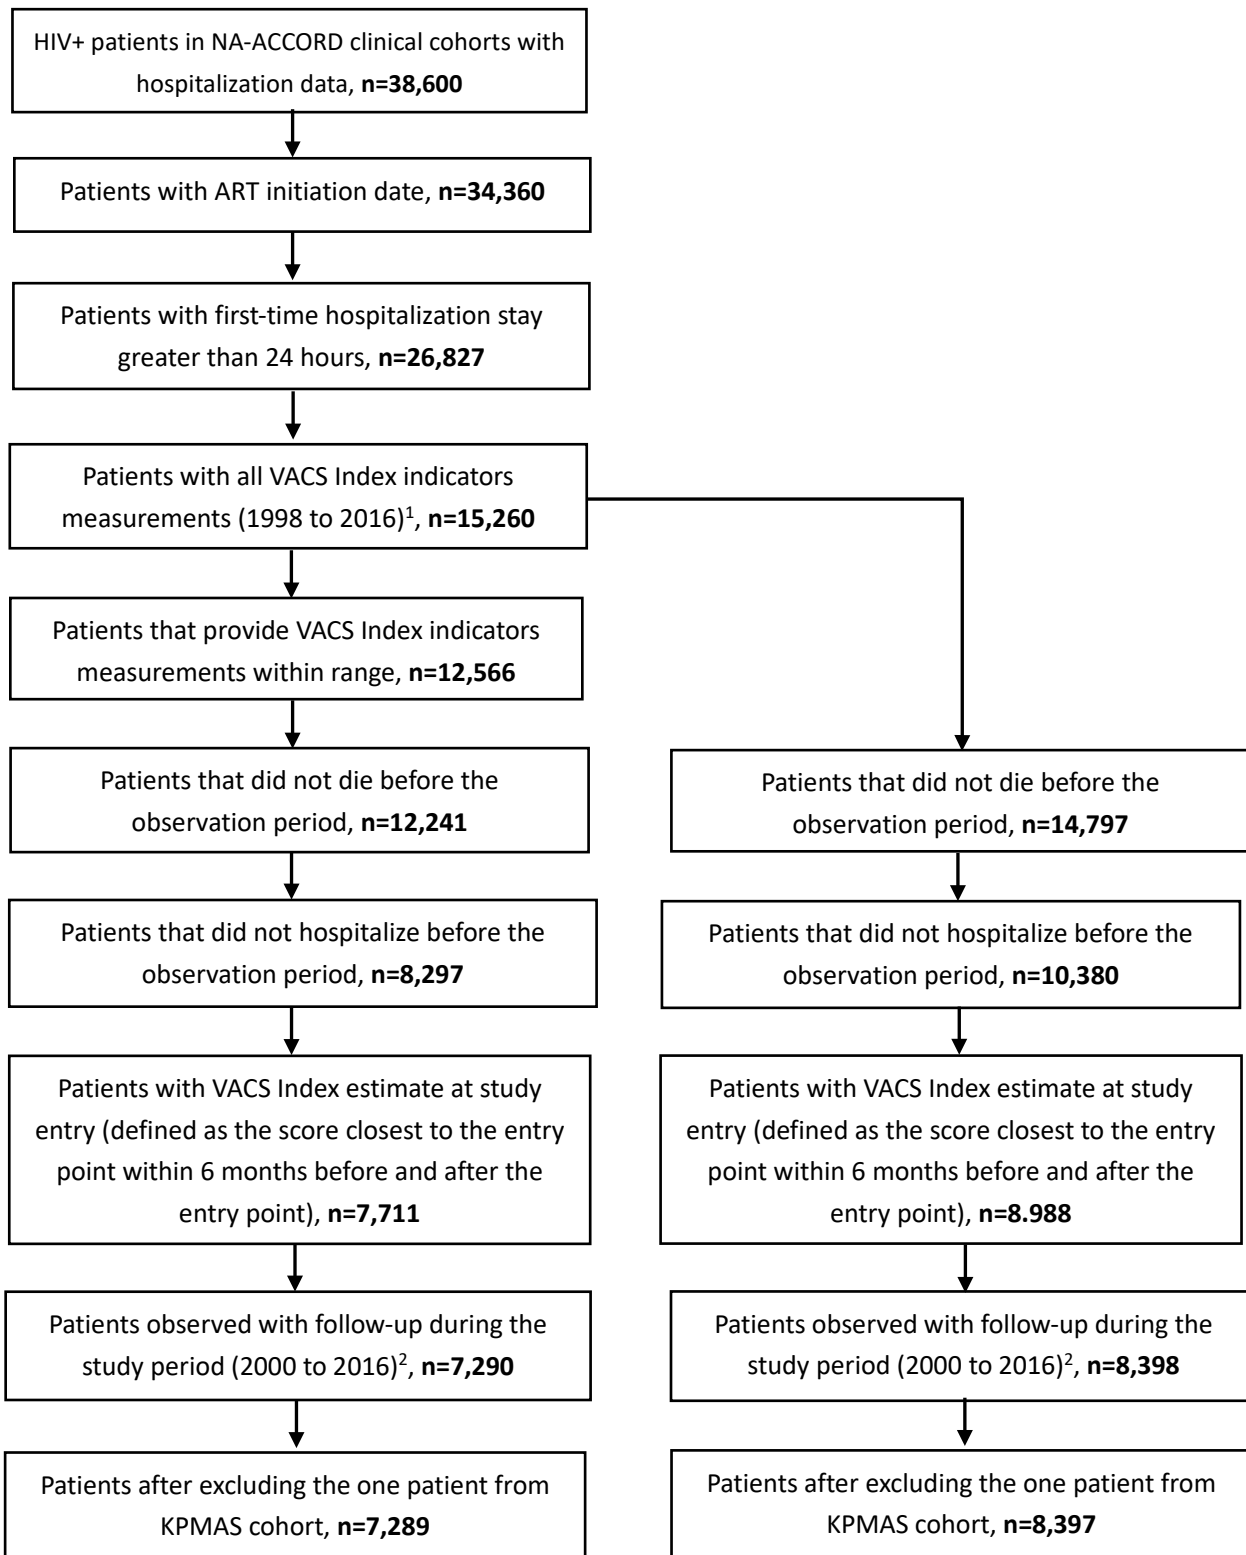

<sup>1</sup>Patients were excluded in this step mostly due to missing albumin data.

<sup>2</sup>Only one patient in Kaiser Permanente Mid-Atlantic States (KPMAS) Cohort was eligible so we chose to exclude the patient.

**Supplement Figure 2.** Observed hazard of hospitalization by parameterizations of VACS Index. A. hazard by categories of study entry VACS Index (<42, 42-53, 53-64,  $\geq 64$ ); B. hazard by categories of time-updated VACS Index (<43, 43-55, 55-68,  $\geq 68$ ); C. hazard by categories of cumulative VACS Index (<78, 78-124, 124-187,  $\geq 187$ ).

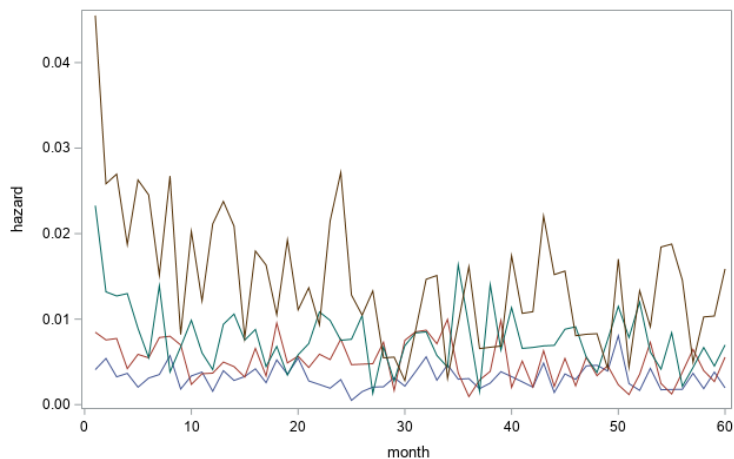

A

entry\_score\_cat — <42 — 42-53 — 53-64 —  $\geq 64$

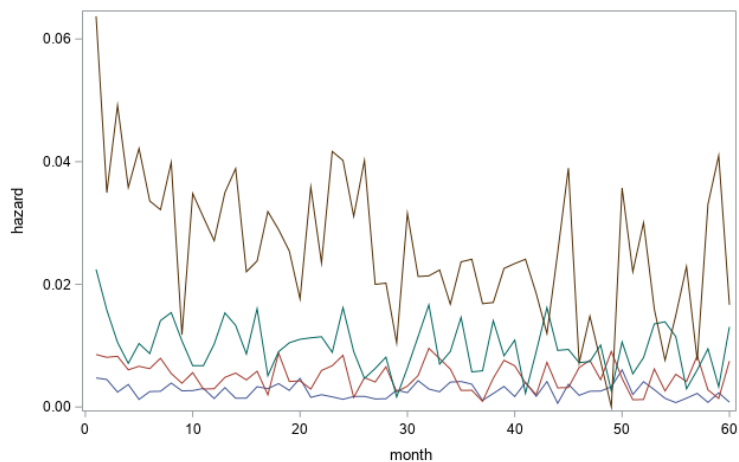

B

updated\_score\_cat — <43 — 43-55 — 55-68 —  $\geq 68$

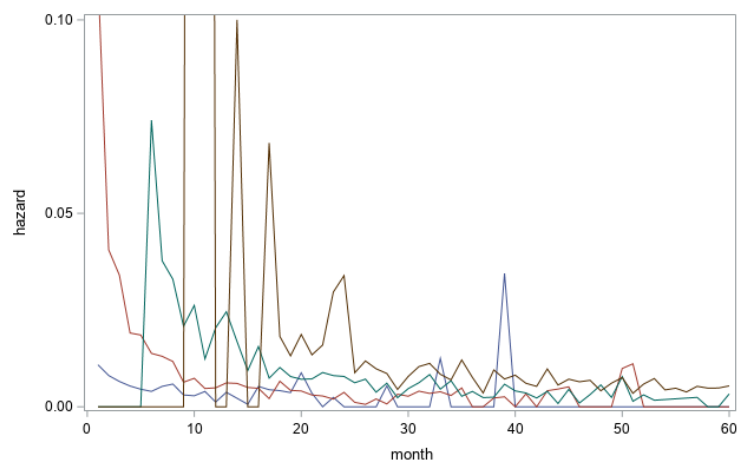

C

cumulative\_score\_cat — <78 — 78-124 — 124-187 —  $\geq 187$

**Supplement Figure 3.** Kaplan-Meier curves for hospitalization-free survival within five years. A. Overall Kaplan-Meier curve for hospitalization-free survival within five years. B. Kaplan-Meier curve for hospitalization-free survival within five years by categories of study entry VACS Index. Study entry VACS Index separated into quartiles with approximately equal number of hospitalizations within each category.

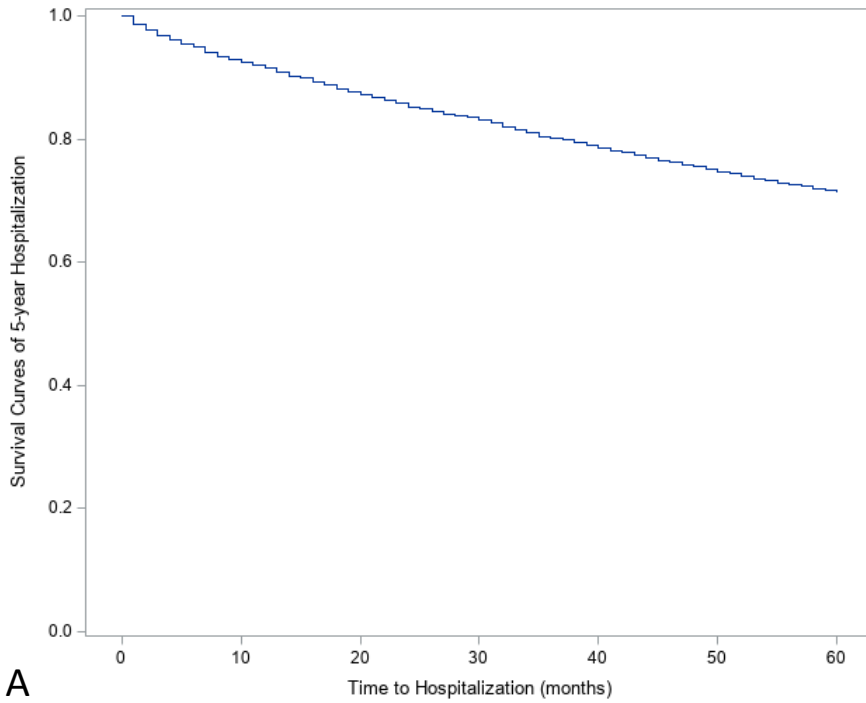

A

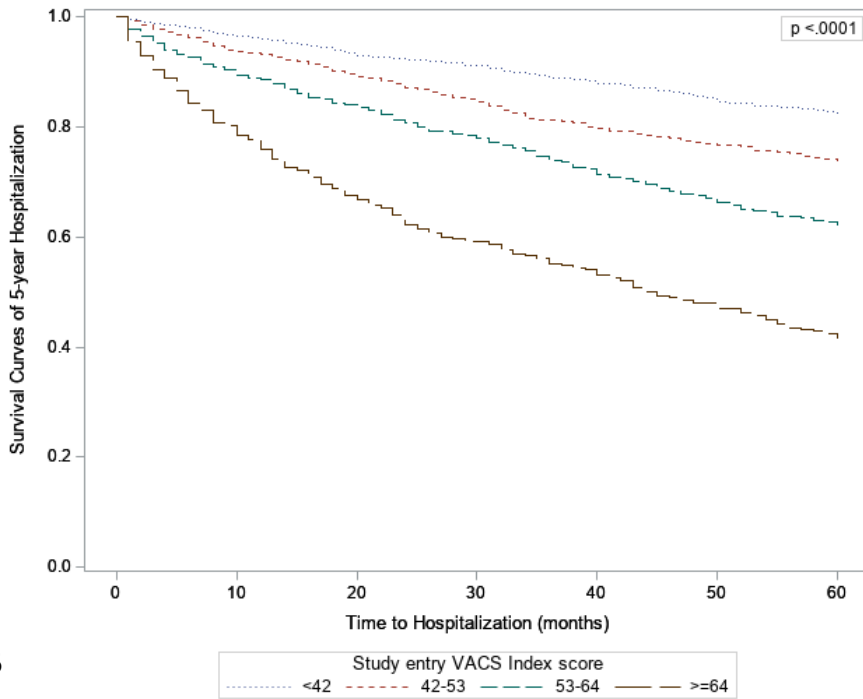

B

**Supplement Table 1.** Range of plausible values and associated VACS Index 2.0 score, setting all other predictors to their median value.

| Predictor                        | Median | Range of plausible values* |      |      |      |      |      |      |      |      |      |
|----------------------------------|--------|----------------------------|------|------|------|------|------|------|------|------|------|
| <b>Age (years)</b>               |        |                            |      |      |      |      |      |      |      |      |      |
| Value                            | 52     | 30                         | 35   | 40   | 45   | 50   | 55   | 60   | 65   | 70   | 75   |
| Score                            | **     | 32                         | 38   | 41   | 43   | 44   | 45   | 47   | 49   | 53   | 59   |
| <b>CD4 cell count (cells/ml)</b> |        |                            |      |      |      |      |      |      |      |      |      |
| Value                            | 435    | 10                         | 100  | 200  | 300  | 400  | 500  | 600  | 700  | 800  | 900  |
| Score                            | **     | 55                         | 53   | 51   | 48   | 45   | 43   | 40   | 37   | 34   | 32   |
| <b>HIV-1 RNA (log copies/mL)</b> |        |                            |      |      |      |      |      |      |      |      |      |
| Value                            | 1.7    | 1.3                        | 1.5  | 1.8  | 2.0  | 2.5  | 3.0  | 3.5  | 4.0  | 4.5  | 5    |
| Score                            | **     | 37                         | 41   | 46   | 48   | 51   | 52   | 51   | 50   | 51   | 55   |
| <b>Hemoglobin (g/dl)</b>         |        |                            |      |      |      |      |      |      |      |      |      |
| Value                            | 14     | 9                          | 9.5  | 10   | 10.5 | 11   | 12   | 13   | 14   | 15   | 16   |
| Score                            | **     | 58                         | 58   | 57   | 55   | 54   | 51   | 47   | 44   | 42   | 42   |
| <b>FIB-4</b>                     |        |                            |      |      |      |      |      |      |      |      |      |
| Value                            | 1.34   | 0.50                       | 1.00 | 1.45 | 2.00 | 3.25 | 4.00 | 5.00 | 6.00 | 7.00 | 7.50 |
| Score                            | **     | 41                         | 43   | 45   | 47   | 51   | 53   | 56   | 58   | 60   | 61   |
| <b>eGFR (ml/min)</b>             |        |                            |      |      |      |      |      |      |      |      |      |
| Value                            | 90     | 0                          | 20   | 40   | 60   | 80   | 100  | 120  | 140  | 160  | 180  |
| Score                            | **     | 53                         | 51   | 49   | 45   | 44   | 44   | 46   | 51   | 55   | 60   |
| <b>Hepatitis C co-infection</b>  |        |                            |      |      |      |      |      |      |      |      |      |
| Value                            | No     | Yes                        |      |      |      |      |      |      |      |      |      |
| Score                            | **     | 51                         |      |      |      |      |      |      |      |      |      |
| <b>Albumin (g/dl)</b>            |        |                            |      |      |      |      |      |      |      |      |      |
| Value                            | 4      | 2.00                       | 2.25 | 2.50 | 2.75 | 3.00 | 3.25 | 3.5  | 4.00 | 4.50 | 5.00 |
| Score                            | **     | 65                         | 62   | 59   | 57   | 54   | 52   | 49   | 44   | 41   | 39   |
| <b>White blood count (k/ml)</b>  |        |                            |      |      |      |      |      |      |      |      |      |
| Value                            | 5.5    | 2.5                        | 3    | 4    | 5    | 6    | 7    | 8    | 9    | 10   | 11   |
| Score                            | **     | 43                         | 42   | 42   | 43   | 46   | 49   | 51   | 54   | 55   | 55   |
| <b>Body mass index (kg/m2)</b>   |        |                            |      |      |      |      |      |      |      |      |      |
| Value                            | 25.3   | 15                         | 17   | 18   | 20   | 22   | 24   | 26   | 28   | 30   | 35   |
| Score                            | **     | 62                         | 57   | 55   | 51   | 48   | 46   | 44   | 42   | 41   | 41   |

\*Clinically meaningful values between lowest and highest values used in development model.

\*\*Score = 44 when all values are set to their median and Hepatitis C is set to no.

**Supplement Table 2.** Akaike Information Criterion<sup>a</sup> values for crude and adjusted complementary log-log regression models<sup>b</sup> among men and women.

|                         | Crude        | Adjusted     |
|-------------------------|--------------|--------------|
| Male, n=6,109           |              |              |
| Study entry VACS Index  | 14638        | 14620        |
| Time-updated VACS Index | <b>14230</b> | <b>14229</b> |
| Cumulative VACS Index   | 14753        | 14706        |
| Female, n=1,180         |              |              |
| Study entry VACS Index  | 3693         | 3670         |
| Time-updated VACS Index | <b>3596</b>  | <b>3589</b>  |
| Cumulative VACS Index   | 3705         | 3674         |

<sup>a</sup>AIC =  $-2(\log\text{-likelihood}) + 2K$ , K is the number of model parameters (the number of variables in the model plus the intercept). Log-likelihood is a measure of model fit. The lower the AIC value, the better the fit.

<sup>b</sup>Adjusted covariates include race/ethnicity, smoking, HIV acquisition risk factor, depression, and calendar year.

**Supplement Table 3.** Akaike Information Criterion<sup>a</sup> values for crude and adjusted complementary log-log regression models<sup>b</sup> among white, Black, and Hispanic.

|                               | Crude       | Adjusted    |
|-------------------------------|-------------|-------------|
| White, n=3,535                |             |             |
| Study entry VACS Index        | 7923        | 7923        |
| Time-updated VACS Index       | <b>7702</b> | <b>7705</b> |
| Cumulative VACS Index         | 7979        | 7973        |
| Black, n=2,319                |             |             |
| Study entry VACS Index        | 7586        | 7557        |
| Time-updated VACS Index       | <b>7380</b> | <b>7366</b> |
| Cumulative VACS Index         | 7633        | 7590        |
| Hispanic <sup>c</sup> , n=986 |             |             |
| Study entry VACS Index        | 2161        | 2170        |
| Time-updated VACS Index       | <b>2098</b> | <b>2108</b> |
| Cumulative VACS Index         | 2151        | 2160        |

<sup>a</sup>AIC =  $-2(\log\text{-likelihood}) + 2K$ , K is the number of model parameters (the number of variables in the model plus the intercept). Log-likelihood is a measure of model fit. The lower the AIC value, the better the fit.

<sup>b</sup>Adjusted covariates include sex, smoking, HIV acquisition risk factor, depression, and calendar year.

<sup>c</sup>Because of the small sample size among Hispanic, the AIC values before and after adjustment are similar.
